# Supplementary material for: Wheat VQ Motif-Containing Protein VQ25-A Facilitates Leaf Senescence via the Abscisic Acid Pathway
Source: MDPI journal article supplement (doi:10.3390/ijms241813839), 2023-09-08
Supplement: s1 [file s1]

|          |                                                          | VQ motif   |     |
|----------|----------------------------------------------------------|------------|-----|
|          |                                                          | FxxxVQxxTG |     |
| TaVQ25-A | MEHGEGRHEAAIRAVQRAFAKEWRGAGATPPFRVYRVEFRFRELVRITCGAGTATT |            | 57  |
| TaVQ25-B | MEHGEGRHEAAIRAVQRAFAKEWRGAGATPPFRVYRVEFRFRELVRITCGAGTATT |            | 57  |
| TaVQ25-D | MEHGEGRHEAAIRAVQRAFAKEWRGAGATPPFRVYRVEFRFRELVRITCGAGTAST |            | 57  |
| TaVQ25-A | GSEAVGARKPPCHAAAAHGRREAPVEECFLYSSWFSAPILSPASMPAGMDPHHGAL |            | 113 |
| TaVQ25-B | GAFAR...AEVHAAAAHGRREAPVEECFLYSSWFSAPILSPASMPAGMDCHHGAL  |            | 109 |
| TaVQ25-D | ATTITQ...APPAAAAHGRCEAPVEECFLYSSWFSAPILSPASMPAGMDCHHGAL  |            | 109 |

**Figure S1.** Alignment of TaVQ25-A, TaVQ25-B and TaVQ25-D amino acid sequences.

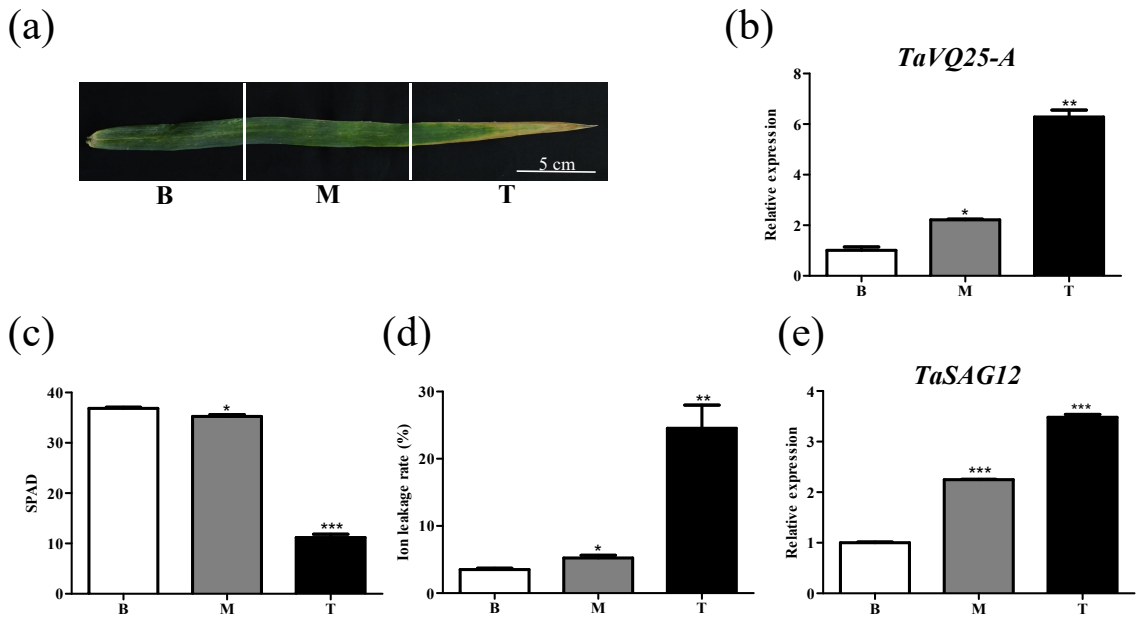

**Figure S2.** *TaVQ25-A* expression in different parts of a senescent wheat flag leaf.

(a) Different parts (B: base, M: middle, and T: tip) of a senescent wheat leaf.

(b) Expression of *TaVQ25-A* in different parts of a senescent wheat leaf.

(c, d) Chlorophyll content (c) and ion leakage rate (d) of different parts of a senescent wheat leaf.

(e) Expression of senescence up-regulated marker gene *TaSAG12* in different parts of a senescent wheat leaf.

Data and error bars represent means  $\pm$  SE. Student's *t*-test, \* $P < 0.05$ , \*\* $P < 0.01$ , \*\*\* $P < 0.001$ . All of the experiments have been repeated at least three times independently.

(a)

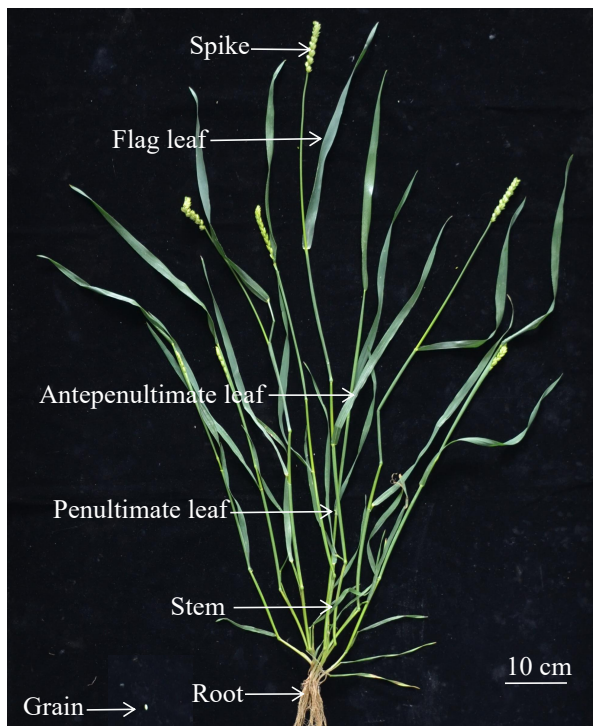

(b)

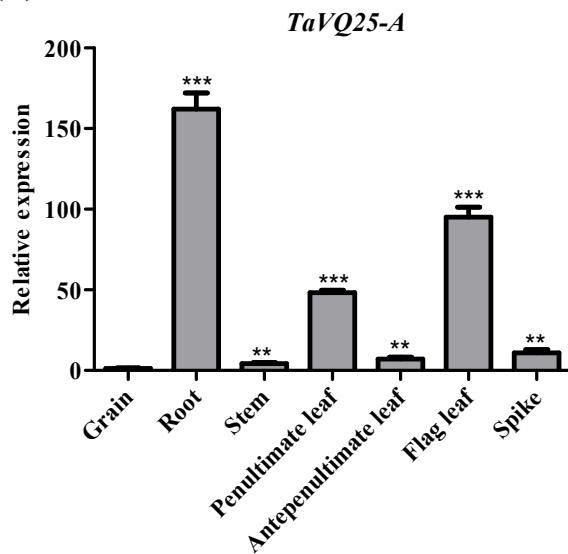

**Figure S3.** Expression pattern of *TaVQ25-A*.

(a) Different tissues of a wheat plant.

(b) Expression of *TaVQ25-A* in different wheat tissues.

Data and error bars represent means  $\pm$  SE. Student's *t*-test, \* $P < 0.05$ , \*\* $P < 0.01$ , \*\*\* $P < 0.001$ . All of the experiments have been repeated at least three times independently.

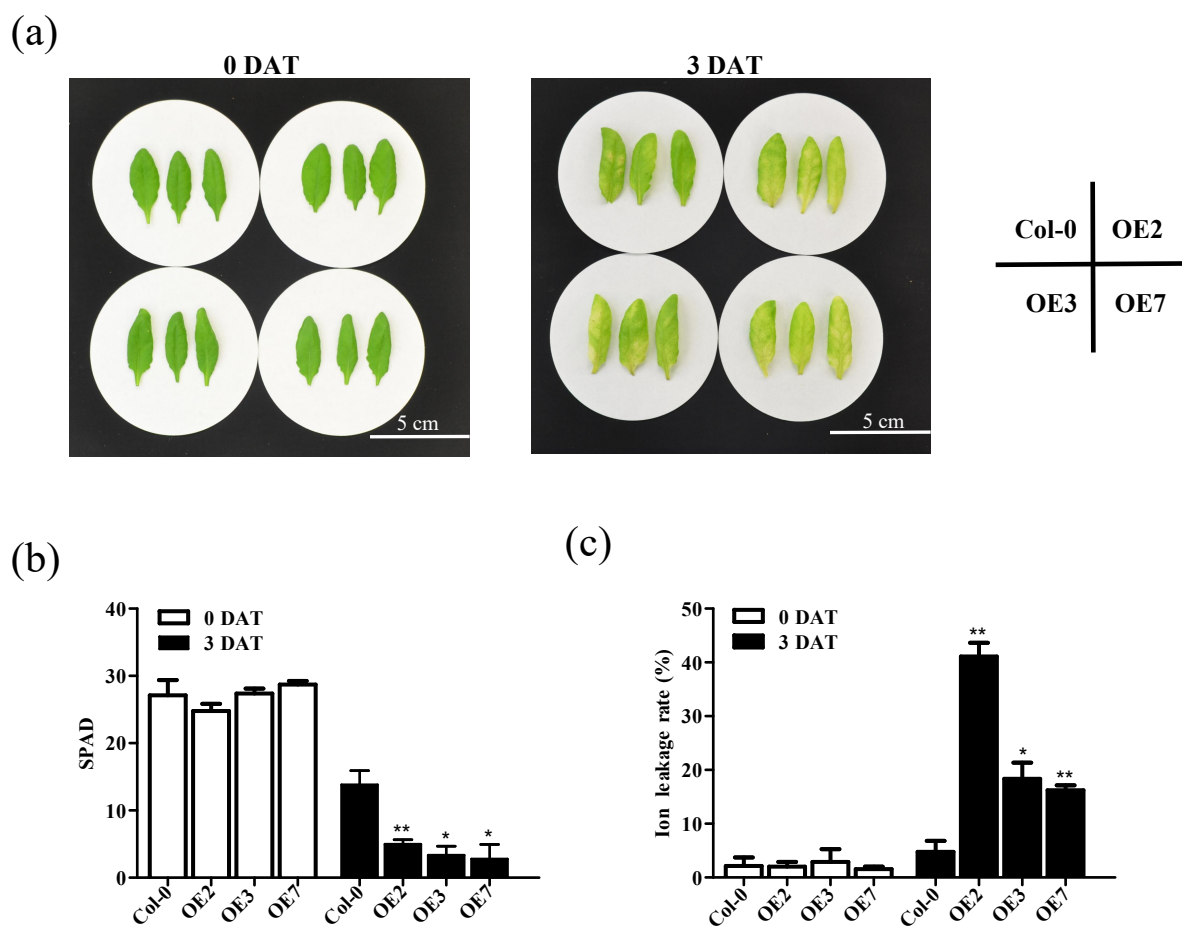

**Figure S4.** Overexpression of *TaVQ25-A* promotes dark-induced leaf senescence.

(a) Detached leaves of 4-week-old Col-0 and *TaVQ25-A*-OE plants were treated with darkness for 3 days. (b, c) Chlorophyll content (b) and ion leakage rate (c) of leaves from 4-week-old transgenic plants as well as Col-0 before and after dark treatment.

Data and error bars represent means  $\pm$  SE. Student's *t*-test, \* $P < 0.05$ , \*\* $P < 0.01$ , \*\*\* $P < 0.001$ . All of the experiments have been repeated at least three times independently.

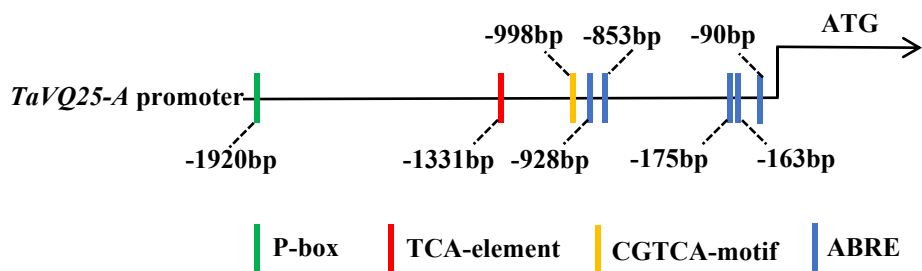

**Figure S5.** Promoter analysis of *TaVQ25-A* in PlantCARE.

The localization of *cis*-elements in *TaVQ25-A* promoter region. P-box is involved in GA responsiveness, TCA-element is involved in SA responsiveness, CGTCA-motif is involved in MeJA responsiveness, and ABRE is involved in ABA responsiveness.
