# Supplementary material for: Wheat VQ Motif-Containing Protein VQ25-A Facilitates Leaf Senescence via the Abscisic Acid Pathway
Source: MDPI journal article supplement (doi:10.3390/ijms241813839), 2023-09-08
Supplement: s1 [file s1]

Table S1. Primers used in this study

| Primers                                            | Sequence (5' to 3' )                 |
|----------------------------------------------------|--------------------------------------|
| <i>TaSAG3</i> (TraesCS5A02G120000)-F for qRT-PCR   | CGACATCCGACGATTCAAC                  |
| <i>TaSAG3</i> -R                                   | TCGCACCACCATCCATTC                   |
| <i>TaSAG5</i> (TraesCS5D02G065100)-F for qRT-PCR   | CGGCTGCGAAGTTGGTTAC                  |
| <i>TaSAG5</i> -R                                   | ACCTGCTCCTGAGATAATGG                 |
| <i>TaSAG12</i> (TraesCS5B02G368300)-F for qRT-PCR  | GCCAACTTCCAGCACTACAGG                |
| <i>TaSAG12</i> -R                                  | AGAACAATGAACCAAGCACACC               |
| <i>TaVQ25-A</i> (TraesCS4A02G290800)-F for qRT-PCR | CGTGGGAGCGAGGAAGG                    |
| <i>TaVQ25-A</i> -R                                 | CGAGCGGCGACCGTAG                     |
| <i>TaACTIN</i> (TraesCS1A02G274400)-F for qRT-PCR  | TGCTATCCTTCGTTTGGACCTT               |
| <i>TaACTIN</i> -R                                  | AGCGGTTGTTGTGAGGGAGT                 |
| <i>AtSAG12</i> (AT5G45890)-F for qRT-PCR           | GGATGTCCCGGTTAATGATG                 |
| <i>AtSAG12</i> -R                                  | TGGAAATCAAAACCACCTCC                 |
| <i>AtSAG29</i> (AT5G13170)-F for qRT-PCR           | GCCACCAGGGAGAAAAGG                   |
| <i>AtSAG29</i> -R                                  | CCACGAAATGTGTTACCATTAGAA             |
| <i>AtCAB1</i> (AT1G29930)-F for qRT-PCR            | TGTGCTGCACTACTCAACCT                 |
| <i>AtCAB1</i> -R                                   | TCCAAGGACTTCAGATGCCG                 |
| <i>AtUBC30</i> (AT5G56150)-F for qRT-PCR           | CAAATCCAAAACCCTAGAAACCGAA            |
| <i>AtUBC30</i> -R                                  | ATCTCCCGTAGGACCTGCACTG               |
| <i>TaVQ25-A</i> -F for CDs                         | ATGGAGCACGGCGAGGGGA                  |
| <i>TaVQ25-A</i> -R                                 | CTACAGCAGAGCGCCATGGT                 |
| <i>TaVQ25-A</i> -F for BSMV-VIGS                   | AAGGAAGTTTAAATGGAGCACGGCGAGGGGAG     |
| <i>TaVQ25-A</i> -R                                 | AACCACCACCACCGTCTACAGCAGAGCGCCATGGTG |
| <i>TaWRKY133</i> (TraesCS3B02G379200)-F for CDs    | ATGACAACCTCGTCGTCAGGGA               |
| <i>TaWRKY133</i> -R                                | TCAGTACTGGGAGTTCTGGAAGA              |
